# Supplementary material for: Corneal remodelling and topography following biological inlay implantation with combined crosslinking in a rabbit model
Source: PubMed Central journal article supplement (PMC6418097; doi:10.1038/s41598-019-39617-0), 2019-03-14
Supplement: 41598_2019_39617_MOESM1_ESM.pdf [file 41598_2019_39617_MOESM1_ESM.pdf]

# Corneal remodelling and topography following biological inlay implantation with combined crosslinking in a rabbit model

Iben Bach Damgaard, MD <sup>1,2</sup>

Yu-Chi Liu, MD, MCI <sup>2,4,5</sup>

Andri Kartasasmita Riau, PhD <sup>2,3</sup>

Ericia Pei Wen Teo <sup>2</sup>

Min Li Tey <sup>2,6</sup>

Chan Lwin Nyein <sup>2</sup>

Jodhbir Singh Mehta, FRCS <sup>2,3,4,5 \*</sup>

<sup>1</sup> Department of Ophthalmology, Aarhus University Hospital, Aarhus, Denmark

<sup>2</sup> Tissue Engineering and Stem Cell Group, Singapore Eye Research Institute, Singapore

<sup>3</sup> School of Materials Science and Engineering, Nanyang Technological University, Singapore

<sup>4</sup> Singapore National Eye Centre, Singapore

<sup>5</sup> Ophthalmology and Visual Sciences Academic Clinical Programme, Duke-NUS Graduate Medical School, Singapore

<sup>6</sup> Yong Loo Lin School of Medicine, National University of Singapore

**Word count:** 4309 words

**Financial support:** This research was supported by the Singapore National Research Foundation under its Translational and Clinical Research (TCR) Programme (NMRC/TCR/1021-SERI/2013) and administered by the Singapore Ministry of Health's National Medical Research Council. Supported in part by grants from The Synoptik Foundation and Fight for Sight, Denmark.

**Competing interests:** Dr. Mehta is a consultant for Ziemer and Carl Zeiss Meditec, Inc. The remaining authors have no conflicts of interests.

## **Correspondence:**

Assoc Prof Jodhbir S. Mehta

Singapore Eye Research Institute,

The Academia, 20 College Road, Discovery Tower Level 6, Singapore 169856

Tel: +65-6227-7255; Fax: +65-6227-7290

E-mail: jodmehta@gmail.com

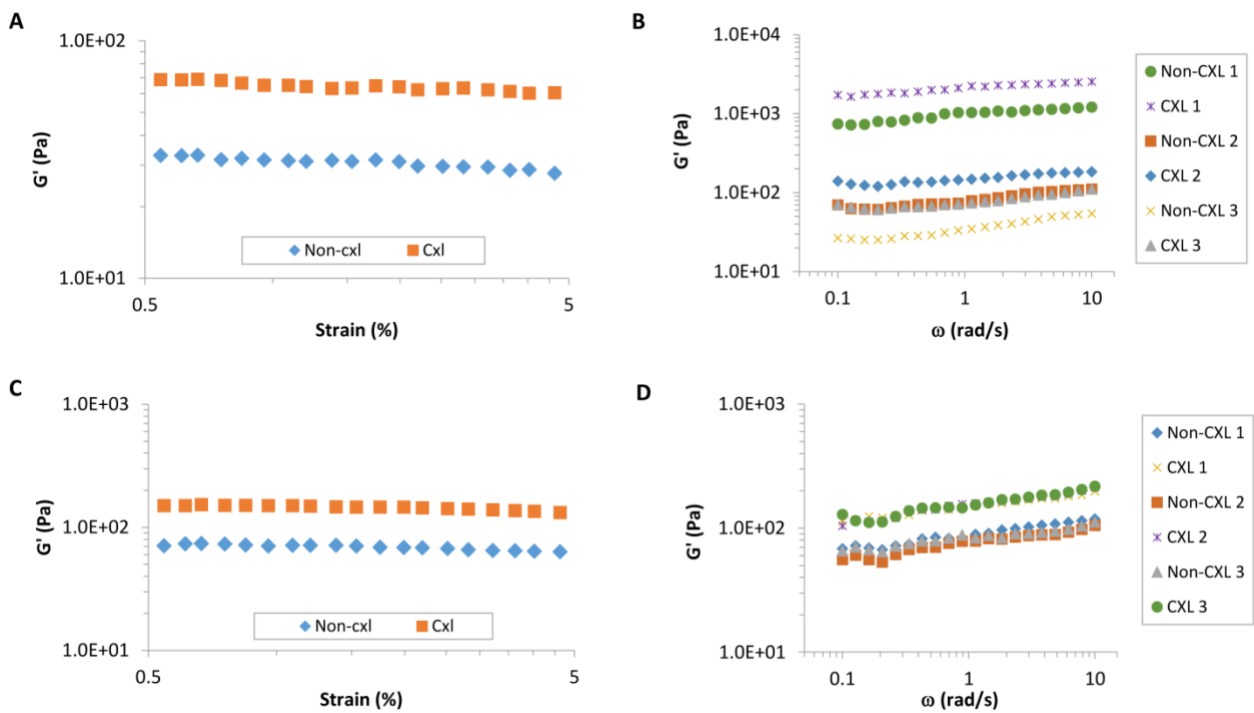

**Supplementary Figure S1.** Dynamic strain sweep and comparison of frequency dependent  $G'$  of crosslinked and non-crosslinked lenticules. (A) Dynamic strain sweep of crosslinked and non-crosslinked human lenticules performed at 1 rad/s and room temperature. (B)  $G'$  of paired crosslinked and non-crosslinked human lenticules performed at 1% strain and room temperature. (C) Similar to human lenticules, dynamic strain sweep of rabbit lenticules was also performed at 1 rad/s and room temperature. (D)  $G'$  of paired crosslinked and non-crosslinked rabbit lenticules.

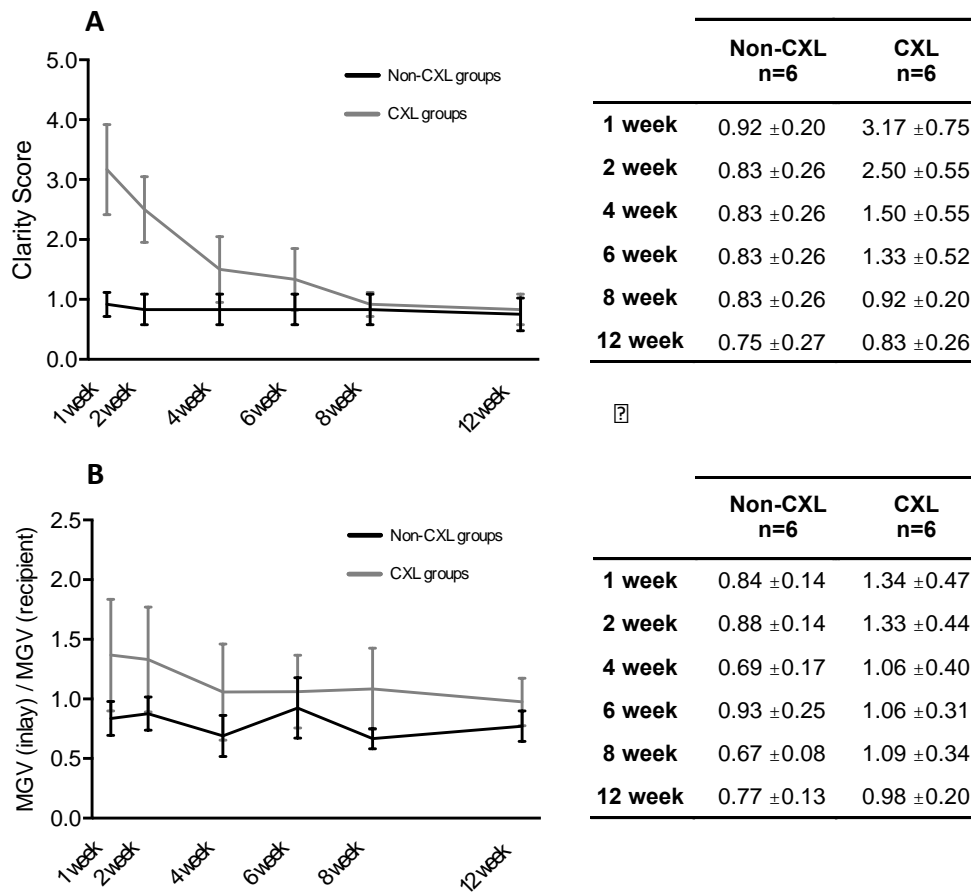

**Supplementary Figure S2: Clarity of non-CXL and CXL inlays following intrastromal implantation.**

(A) Clarity Score for the CXL treated and untreated inlays, evaluated by biomicroscopy. 0: None, 4: Severe. (B) The ratio of the mean gray value ( $MGV_{inlay} / MGV_{recipient}$ ) for the CXL treated (CXL-90 and CXL-120) and untreated groups (non-CXL-90 and non-CXL-120). The MGV, ranging from 0 to 255, was measured using 32-bit grey scale OCT images and the ImageJ software. No difference in MGV ratio was seen between the CXL treated and untreated inlays at 12-week examination ( $p=0.06$ ).

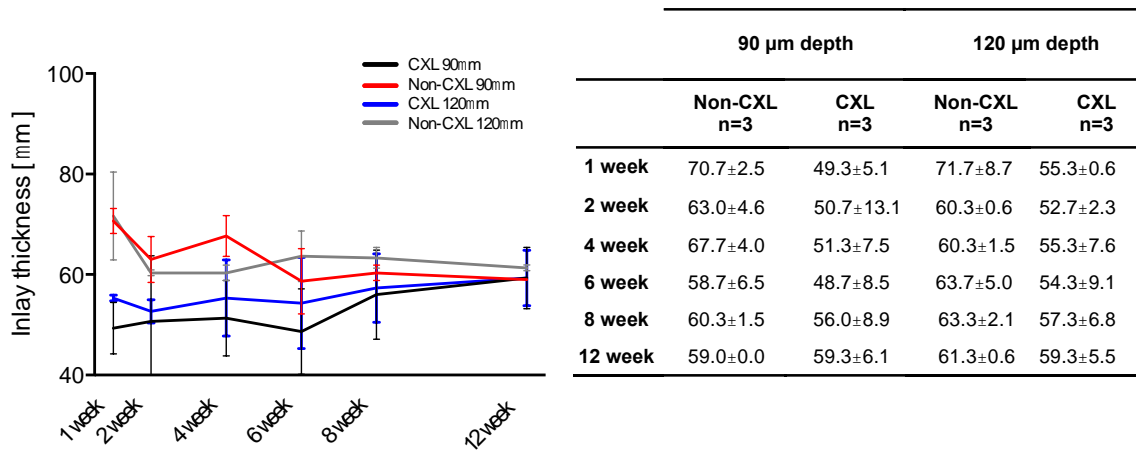

**Supplementary Figure S3:** The average inlay thickness acquired using anterior segment optical coherence tomography and the ImageJ software.
